# Supplementary material
Source: Springer Nature journal article supplement (https://www.springermedizin.de/resource/supplementary/13256_2008_1112_MOESM2_ESM.pdf/9647030)

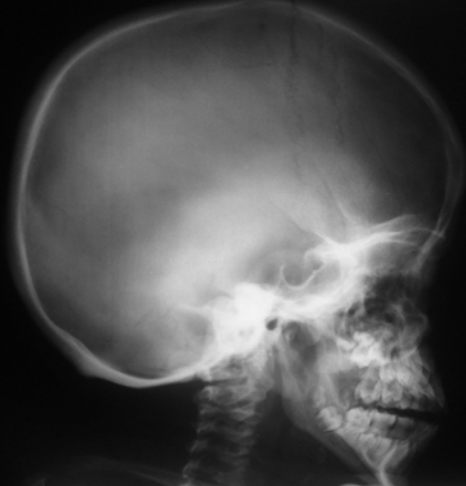

Supplement: MOESM2 [file 9647030]
